# Supplementary material
Source: Elsevier journal article supplement (https://univ-rennes.hal.science/hal-01208401v1/file/mmc1.pdf)
Supplement: mmc1 [file mmc1.pdf]

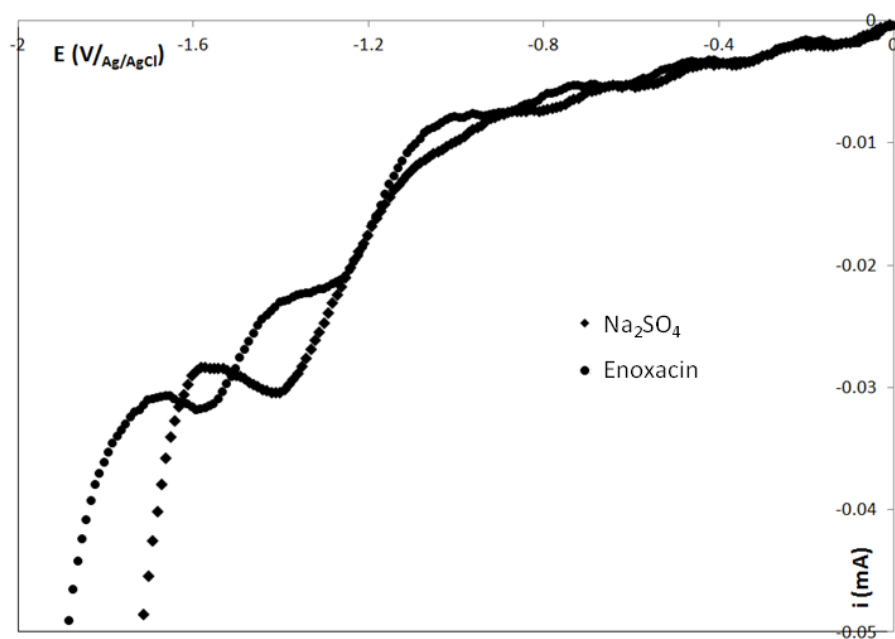

**Supplementary material 1:** Current-potential curves obtained by cyclic voltammetry with a vitreous carbon electrode ( $S = 3.14 \text{ mm}^2$ ),  $r = 20 \text{ mV.s}^{-1}$ , under nitrogen atmosphere and  $T = 298 \text{ K}$ , in  $Na_2SO_4$   $0.05 \text{ mol.L}^{-1}$  at pH 3.
